# Supplementary material
Source: publisher site journal article supplement (https://jmir.org/api/download?alt_name=mededu_v11i1e57424_app6.pdf&filename=39f371e1-da96-11ef-9b69-e57530adaf64.pdf)
Supplement: Supplementary file [file download]

# Amended Qualitative Interview Timeline

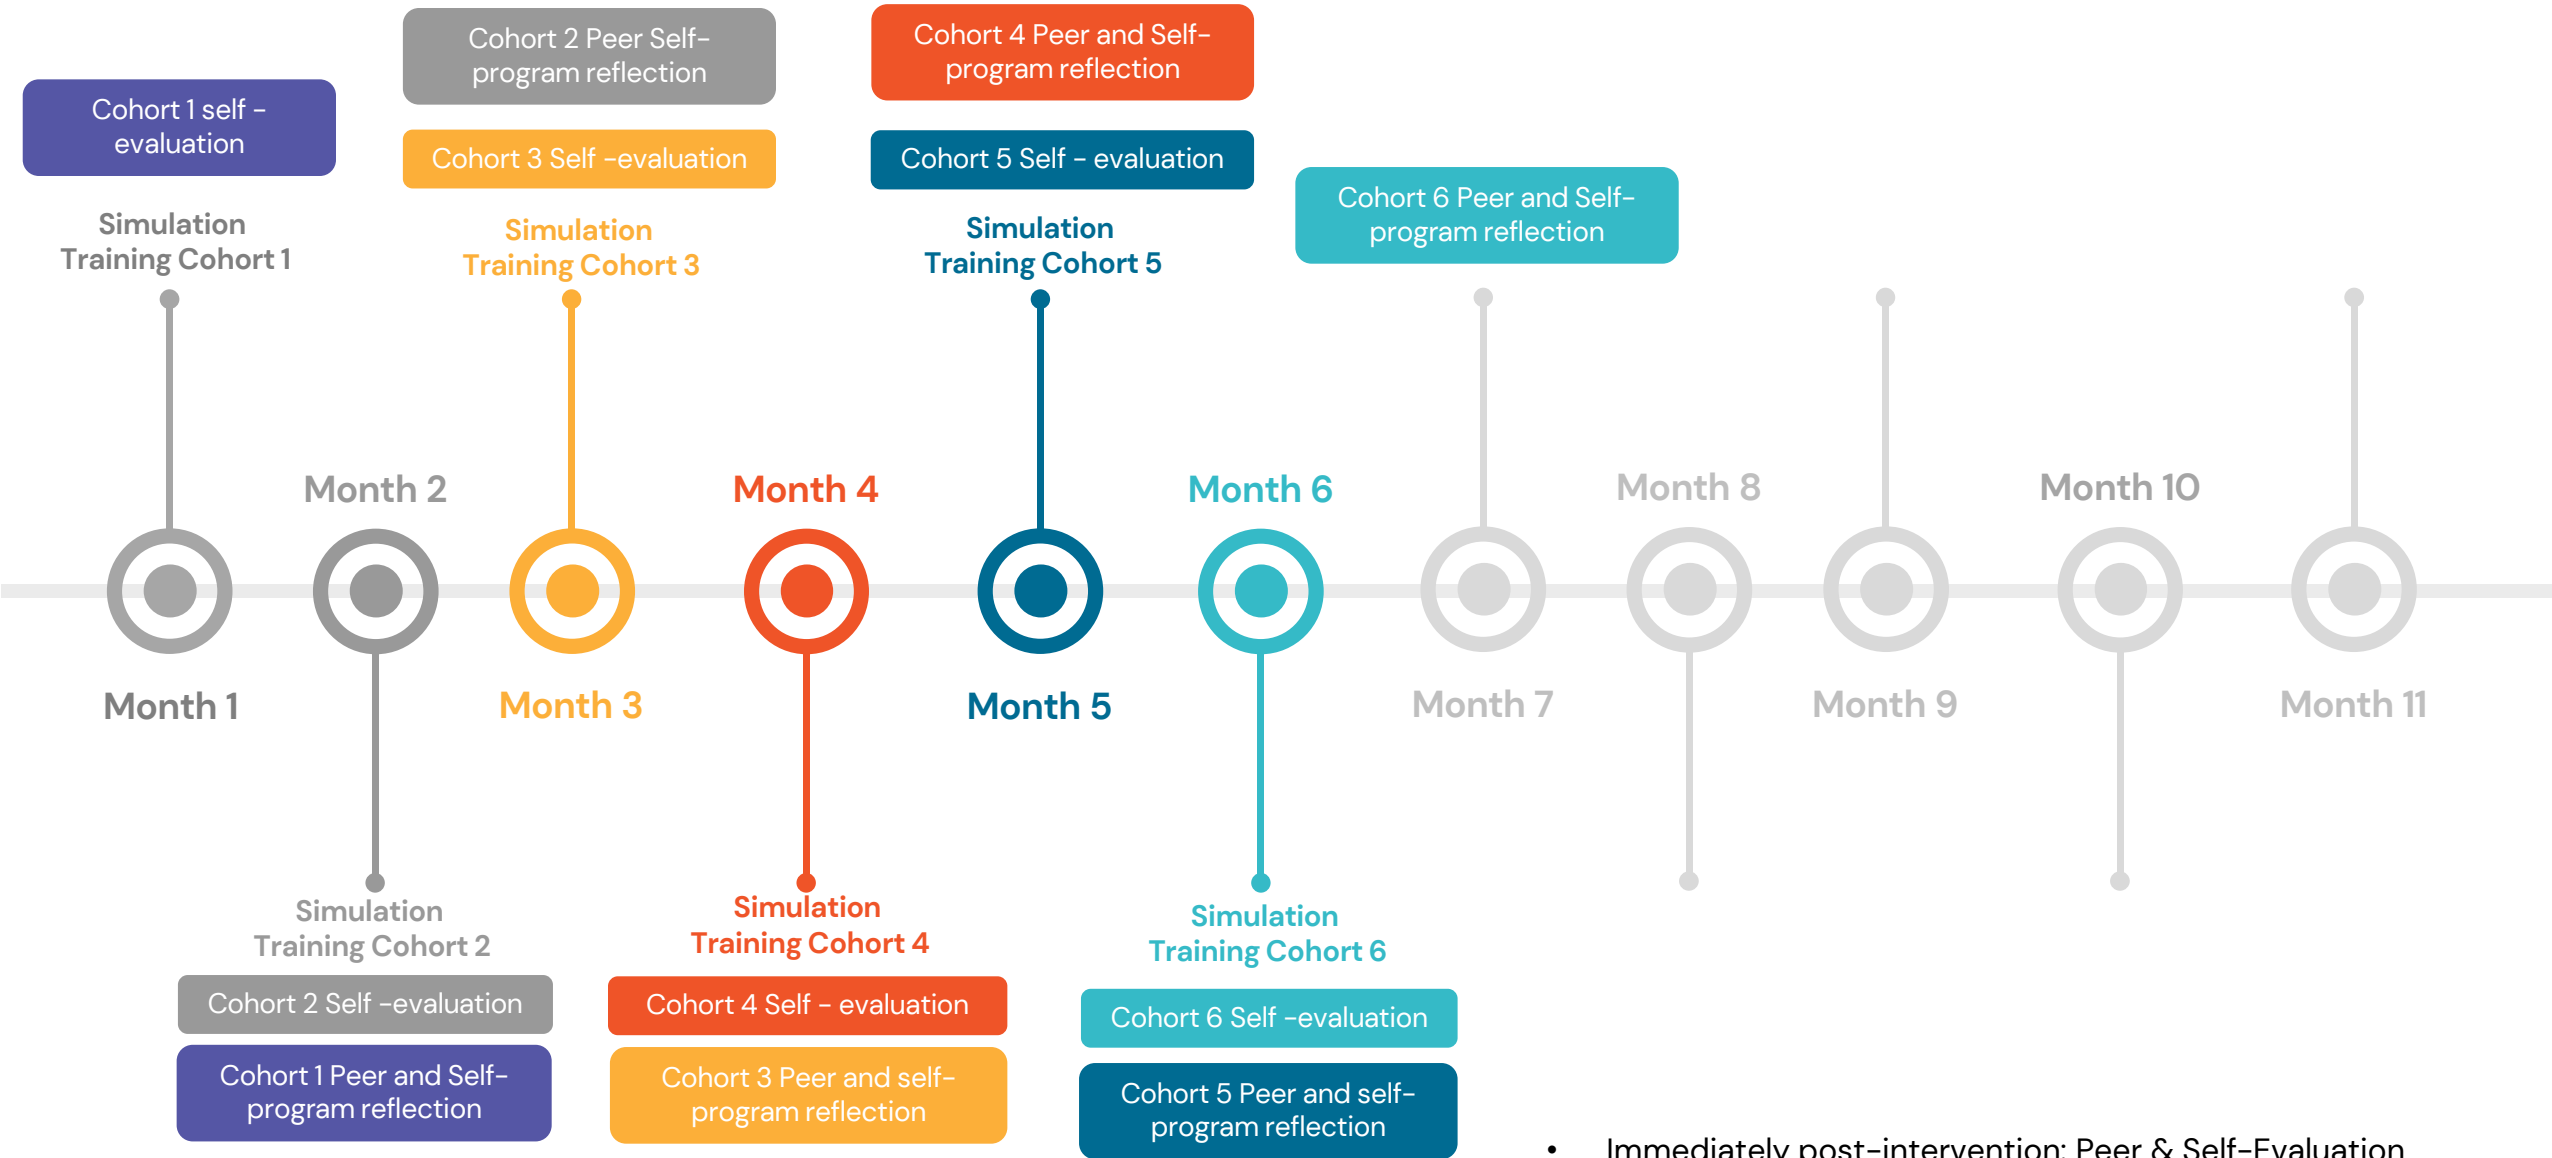

- Immediately post-intervention: Peer & Self-Evaluation
- 1-month post-intervention : Peer & Self- Program Reflection
